# Supplementary material
Source: publisher figshare collection journal article supplement (https://acs.figshare.com/ndownloader/files/4465984)
Supplement: Supplementary file 1 [file 4465984]

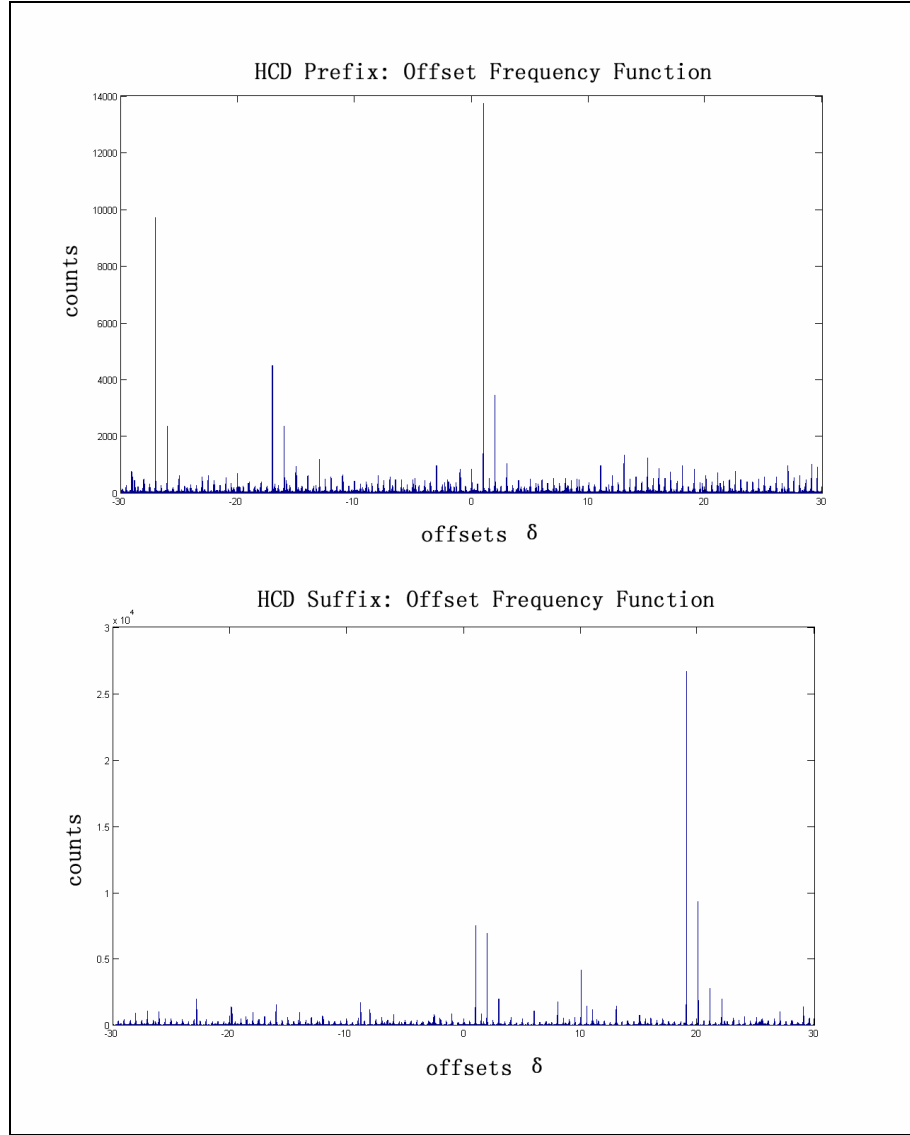

**Figure S1.** Plots of Offset Frequency Functions for prefix/suffix of HCD spectra mentioned in the algorithm section. In the plot of the prefix OFF, the 3 most intense peaks are located at 1.0061, -26.9885 and -17.0041, and we can confidently infer their corresponding ion types as *b*, *a*, and *b*- $H_2O$  (Table 2). In the plot of the suffix OFF, the peak located at 19.0159 is undoubtedly attributed to *y*-ions, and the next two peaks at 20.0189 and 21.0217 are mainly due to isotopic peaks of *y*-ions. The average distance between two adjacent peaks in this cluster is 1.0029, which is very close to the theoretical value, 1.0034. The offsets at 1.9905 and 1.0065 correspond to *y*- $NH_3$  and *y*- $H_2O$  ions. In addition, we also chose to consider the offset at 10.0106, which is due to the  $y^{2+}$  ions, in the pNovo algorithm. It appears in the triply charged spectra with a relatively higher frequency.

**Table S1.** Probabilities of common ion types appeared in HCD data, with the consideration of mass regions and the relations between these types of ions.

|                                          | <b>total</b> | <b>low</b> | <b>medium</b> | <b>high</b> |
|------------------------------------------|--------------|------------|---------------|-------------|
| <i>Prob (a)</i>                          | 0.200        | 0.464      | 0.097         | 0.051       |
| <i>Prob (b)</i>                          | 0.286        | 0.0533     | 0.217         | 0.111       |
| <i>Prob(y)</i>                           | 0.668        | 0.661      | 0.783         | 0.539       |
| <i>Prob(y<sup>0</sup>)</i>               | 0.155        | 0.235      | 0.118         | 0.125       |
| <i>Prob(y<sup>*</sup>)</i>               | 0.177        | 0.273      | 0.156         | 0.111       |
| <i>Prob(y<sup>2+</sup>)</i>              | 0.100        | 0.033      | 0.071         | 0.199       |
| <i>Prob(y<sup>2+</sup>)<sup>#</sup></i>  | 0.388        | 0.089      | 0.413         | 0.634       |
| <i>Prob(yl<sup>*</sup>y)</i>             | 0.932        | 0.924      | 0.948         | 0.922       |
| <i>Prob(yl<sup>0</sup>y)</i>             | 0.970        | 0.951      | 0.989         | 0.982       |
| <i>Prob(y<sup>0</sup>ly)</i>             | 0.225        | 0.338      | 0.149         | 0.228       |
| <i>Prob(y<sup>*</sup>ly)</i>             | 0.247        | 0.382      | 0.190         | 0.189       |
| <i>Prob(bla)</i>                         | 0.739        | 0.691      | 0.877         | 0.867       |
| <i>Prob (alb)</i>                        | 0.518        | 0.602      | 0.392         | 0.398       |
| <i>Prob (bly)</i>                        | 0.328        | 0.159      | 0.254         | 0.649       |
| <i>Prob (ylb)</i>                        | 0.766        | 0.657      | 0.917         | 0.952       |
| <i>Prob(yl<sup>2+</sup>)<sup>#</sup></i> | 0.520        | 0.977      | 0.889         | 0.188       |

# only triply charged spectra are considered.

Note: y<sup>0</sup> and y<sup>\*</sup> denote y-ions with a neutral loss of water and ammonia, respectively. Three regions, low, medium and high ones, are computed by evenly split the range between 0 and the value of the peptide molecular weight plus a Proton.

**Table S2.** Proteins used in the Experiments and their corresponding IDs in Swiss-Prot database (v.56.2)

| <b>Protein</b>         | <b>ID in Swiss-Prot database</b> |
|------------------------|----------------------------------|
| Myosin                 | Q28641                           |
| Glycogen phosphorylase | P00489                           |
| Serum albumin          | P02769                           |
| Beta-galactosidase     | P00722                           |
| Carbonic anhydrase     | P00921                           |
| Trypsin inhibitor      | P01070                           |
| Ovalbumin              | P01012                           |
| Lysozyme               | P00698                           |

**Table S3.** Parameters of database search.

| Item                          | Setting in pFind and Mascot                                                                    |
|-------------------------------|------------------------------------------------------------------------------------------------|
| Database                      | Target-reversed strategy is used and the target database consists of the proteins in Table S2. |
| Enzyme                        | Trypsin                                                                                        |
| Maximum missed cleavage sites | 2                                                                                              |
| Precursor tolerance           | $\pm 10$ ppm                                                                                   |
| Fragment tolerance            | $\pm 0.01$ Da                                                                                  |
| Fixed Modifications           | Carbamidomethylation (C)                                                                       |
